# Supplementary material for: Disaccharide compositional analysis of chondroitin sulphate using WAX HILIC-MS with pre-column procainamide labelling; application to the placenta in pre-eclampsia
Source: Royal Society of Chemistry journal article supplement (doi:10.1039/d3ay01578e), 2024-01-01
Supplement: d3ay01578e1.pdf [file d3ay01578e1.pdf]

Electronic supplementary information

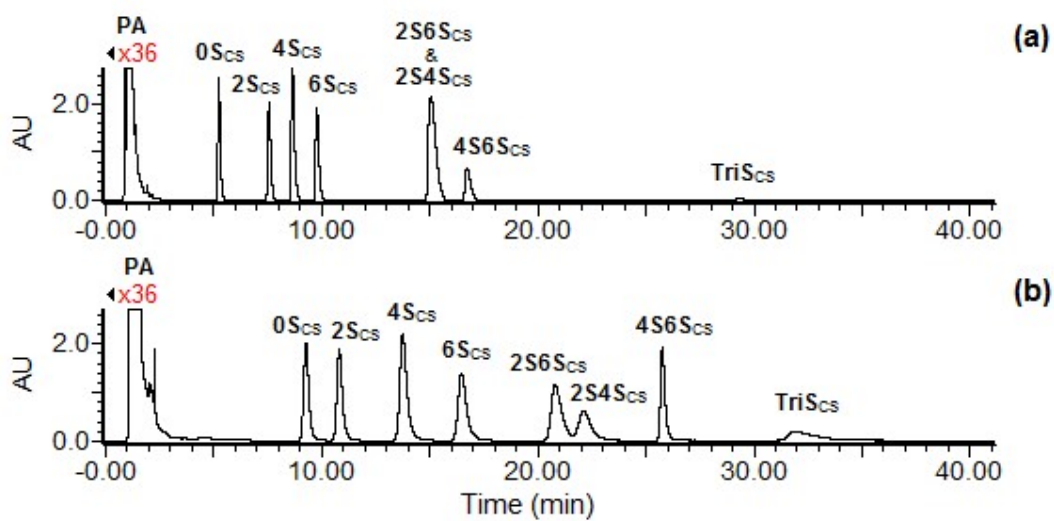

**Figure S-1:** Effect of ammonium formate (pH 4.4) concentration on procainamide (PA)-labelled CS disaccharide separation using GlycanPac AXH-1 (a) 50 mM (b) 150 mM

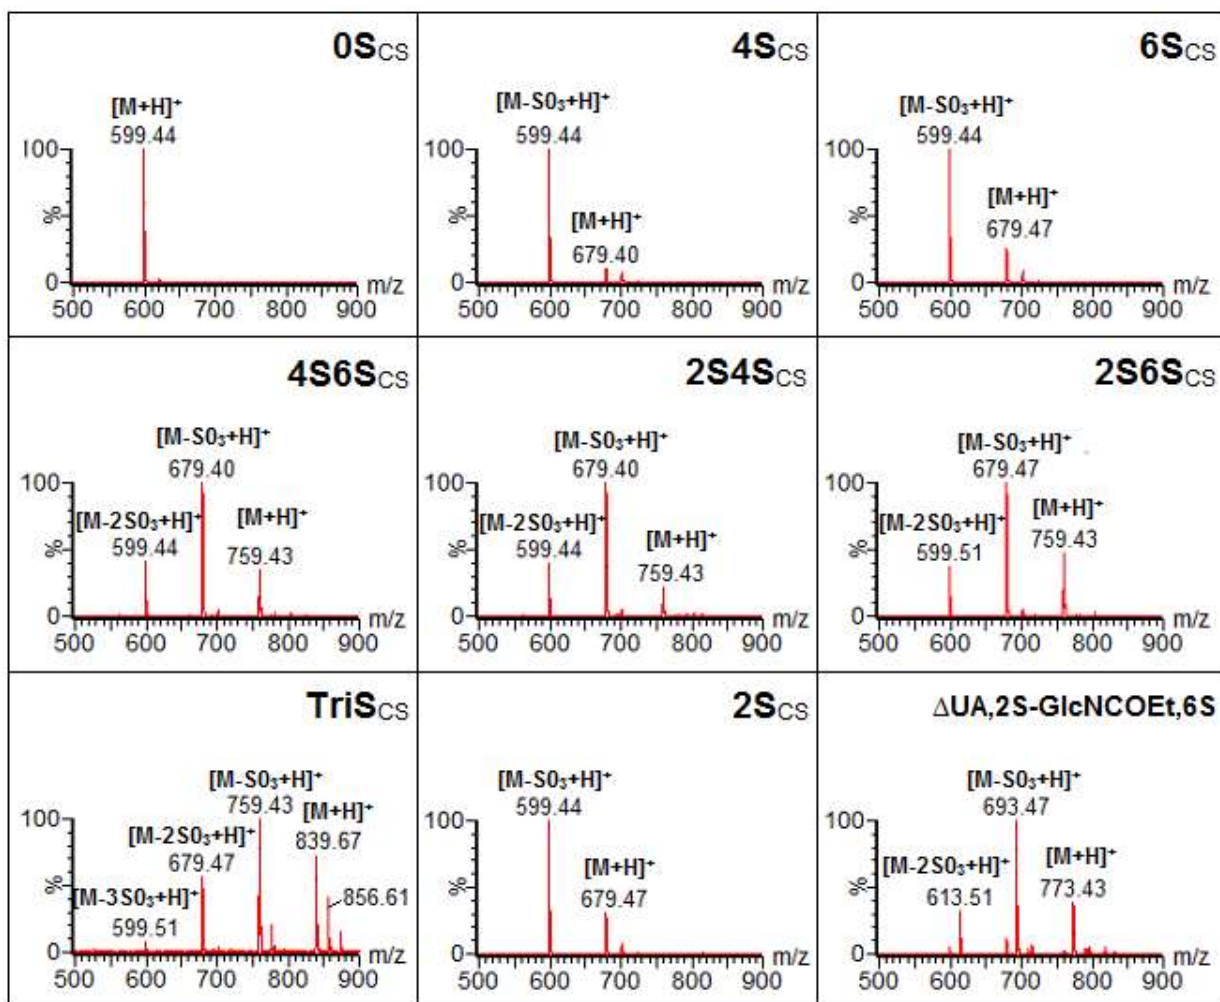

**Figure S-2:** Mass spectra of procainamide-labelled CS disaccharides and internal standard ( $\Delta$ UA,2S – GlcNCOEt-6S)

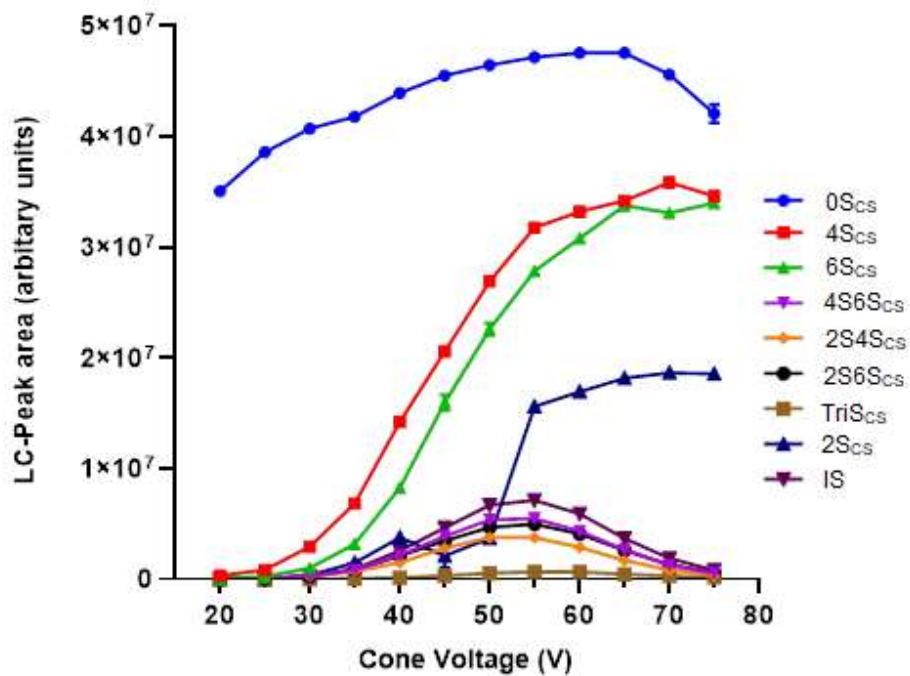

**Figure S-3:** LC-Peak area of procainamide-derivatised CS disaccharides and disaccharide internal disaccharide standard (20 µg/mL each) as a function of MS cone voltage.

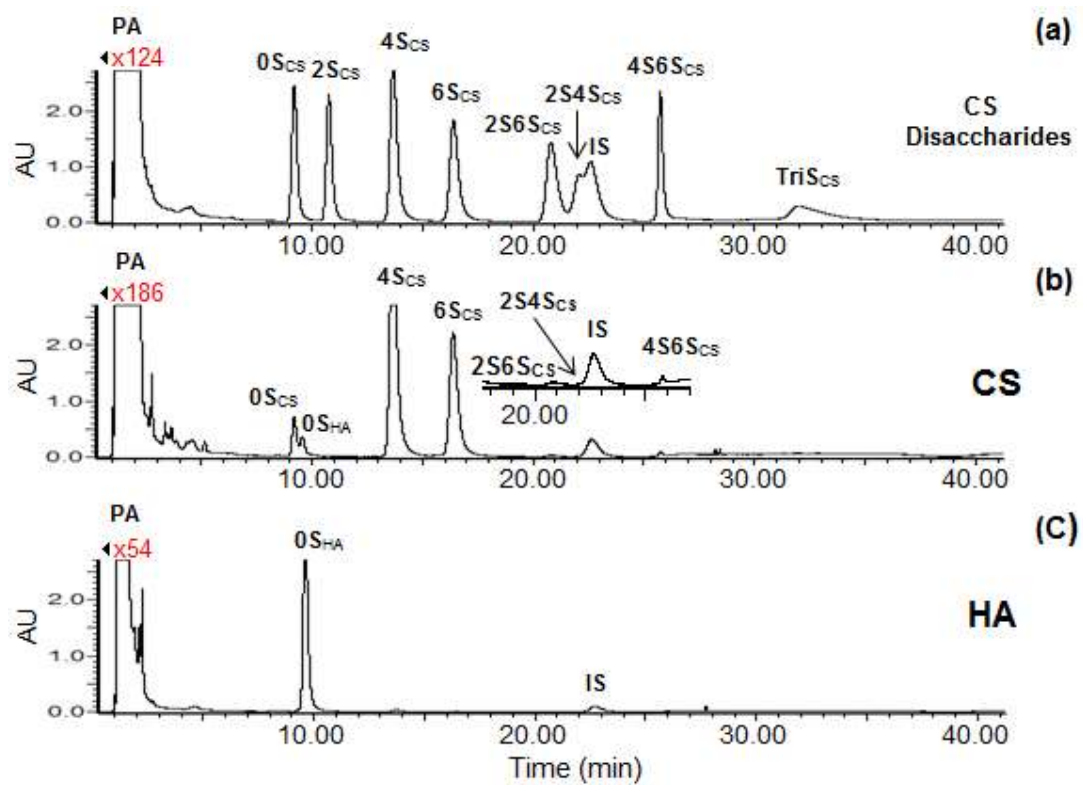

**Figure S-4:** Chromatogram of procainamide (PA)-labelled (a) CS disaccharides and internal standard (b) disaccharide composition of bovine cartilage CS and (c) rooster comb HA upon chondroitinase ABC digestion.
